# Supplementary material for: Association between remnant lipoprotein cholesterol levels and non-alcoholic fatty liver disease in adolescents
Source: PubMed Central journal article supplement — JHEP Rep. 2020 Jul 24;2(6):100150. doi: 10.1016/j.jhepr.2020.100150 (PMC7495103; doi:10.1016/j.jhepr.2020.100150), 2020-07-24
Supplement: mmc1.pdf [file mmc1.pdf]

## JHEP Reports

### CTAT methods

Tables for a “Complete, Transparent, Accurate and Timely account” (CTAT) are now mandatory for all revised submissions. The aim is to enhance the reproducibility of methods.

- Only include the parts relevant to your study
- Refer to the CTAT in the main text as ‘Supplementary CTAT Table’
- Do not add subheadings
- Add as many rows as needed to include all information
- Only include one item per row

**If the CTAT form is not relevant to your study, please outline the reasons why:**

The data utilised in this study was obtained from the West Australian pregnancy cohort (Raine study). The study methods are described in the manuscript text. Additional details about the study can be found online <https://rainestudy.org.au/>

#### 1.1 Antibodies

| Name | Citation | Supplier | Cat no. | Clone no. |
|------|----------|----------|---------|-----------|
| n/a  |          |          |         |           |

#### 1.2 Cell lines

| Name | Citation | Supplier | Cat no. | Passage no. | Authentication test method |
|------|----------|----------|---------|-------------|----------------------------|
| n/a  |          |          |         |             |                            |

#### 1.3 Organisms

| Name | Citation | Supplier | Strain | Sex | Age | Overall n number |
|------|----------|----------|--------|-----|-----|------------------|
| n/a  |          |          |        |     |     |                  |

#### 1.4 Sequence based reagents

| Name | Sequence | Supplier |
|------|----------|----------|
| n/a  |          |          |

#### 1.5 Biological samples

| Description | Source | Identifier |
|-------------|--------|------------|
| n/a         |        |            |

#### 1.6 Deposited data

| Name of repository | Identifier | Link |
|--------------------|------------|------|
| n/a                |            |      |

## 1.7 Software

| Software name                          | Manufacturer | Version |
|----------------------------------------|--------------|---------|
| Statistical software - SPSS statistics | IBM Corp.    | 20.0    |

## 1.8 Other (e.g. drugs, proteins, vectors etc.)

|     |  |  |
|-----|--|--|
| n/a |  |  |
|     |  |  |

## 1.9 Please provide the details of the corresponding methods author for the manuscript:

**Dr Oyekoya Ayonrinde**  
Department of Gastroenterology and Hepatology, Fiona Stanley Hospital, 11 Robin Warren Drive, Murdoch, 6150, Western Australia, Australia.  
+618 61522827  
Oyekoya.ayonrinde@uwa.edu.au

## 2.0 Please confirm for randomised controlled trials all versions of the clinical protocol are included in the submission. These will be published online as supplementary information.

n/a

### Corresponding methods author

**Dr Oyekoya Ayonrinde**

**Department of Gastroenterology and Hepatology, Fiona Stanley Hospital**

**11 Robin Warren Dr, Murdoch WA 6150, Australia**

**Oyekoya.ayonrinde@uwa.edu.au**

**Telephone: +618 6152 2827**
